# Supplementary material for: Nox2 contributes to age-related oxidative damage to neurons and the cerebral vasculature
Source: JCI journal article supplement (doi:10.1172/jci125173), 2019-07-21
Supplement: sd1 [file 1]

## Supplemental Figures I-IX

### Supplemental Figure I: Age-related increases in body weight and blood pressure.

#### A) Food intake

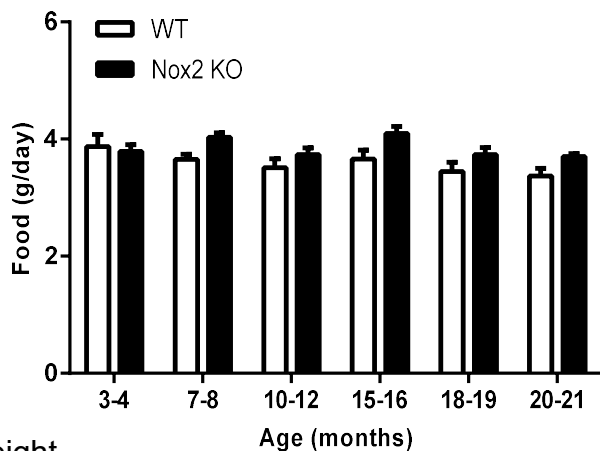

#### B) Body weight

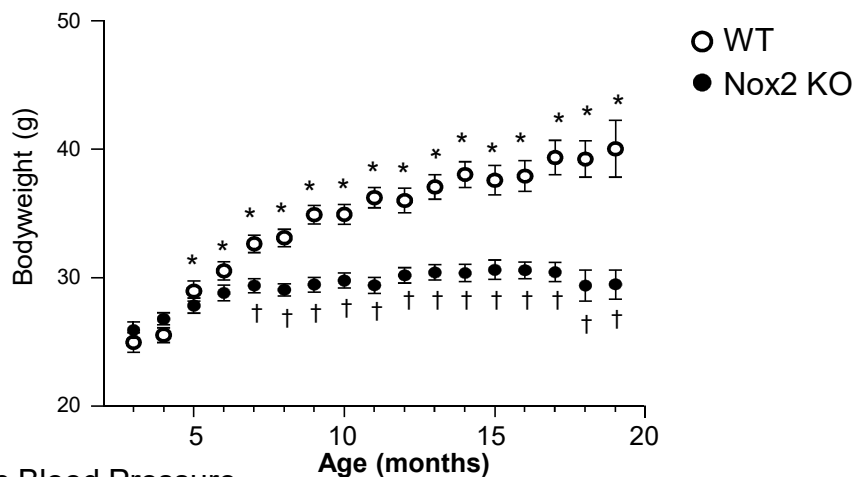

#### C) Systolic Blood Pressure

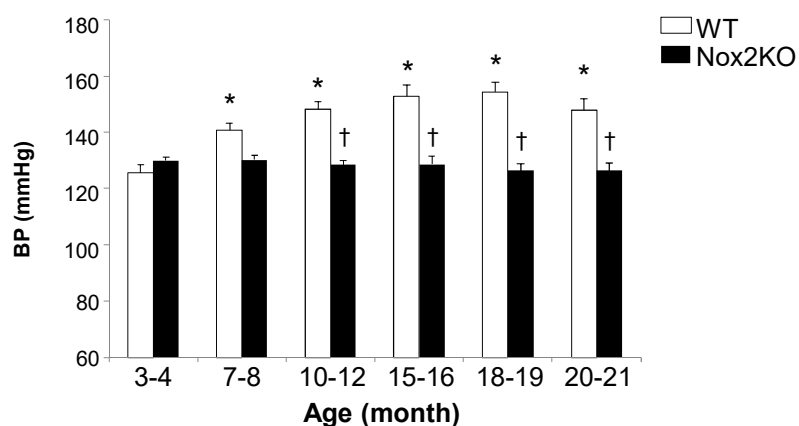

Figure I. (A) Daily food intake was measured in 3 month intervals. The mean of 3 individual 24 hour food intakes was used for each mouse. B) Bodyweight was measured every month. C) Blood pressure was measured in 3 month intervals. Data expressed as mean  $\pm$  SEM, n=9 mice per group. Comparisons made by two-way ANOVA with bonferroni post-hoc test. \*p<0.05 for indicated values versus values of 3-4m WT mice; † p<0.05 for indicated Nox2KO values versus values of age-matched WT mice

**Supplemental Figure II: Vertical movement activity and brain weight of WT and Nox2KO mice**

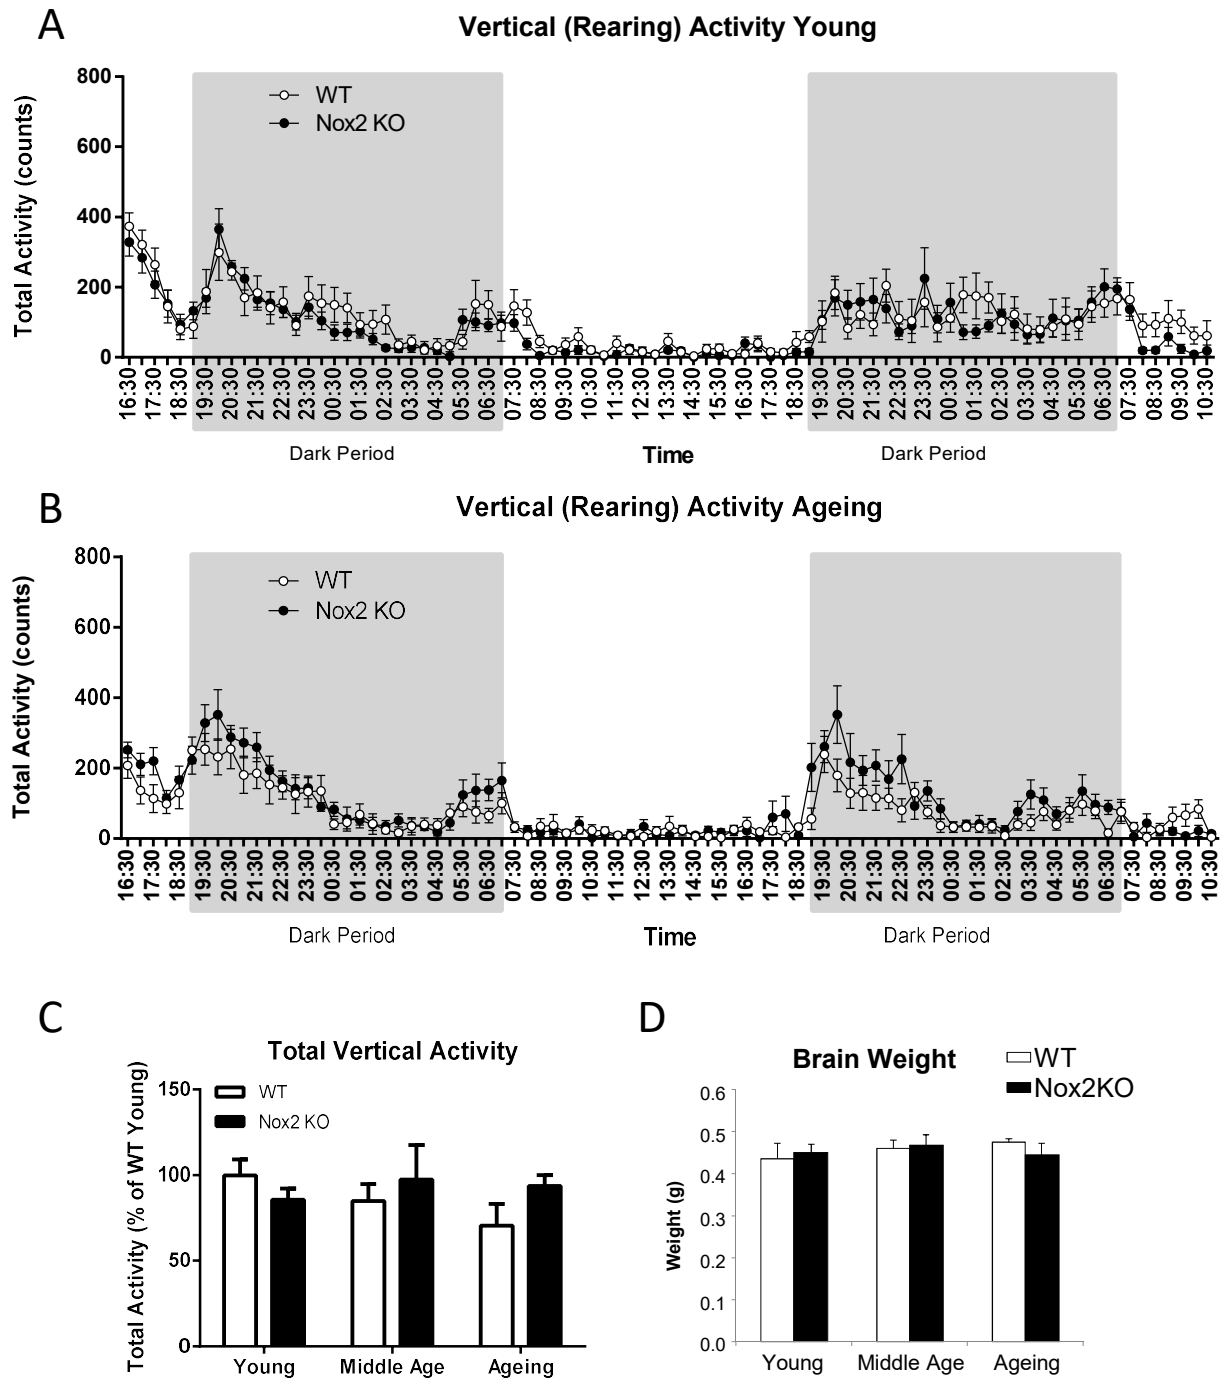

Figure II. Representative graphs of vertical (rearing) locomotor activities of WT and Nox2KO mice. (A) Young mice; (B) Ageing mice. The data was collected in 30-min bins over a 42 hour period. (C) Total vertical activity (42h). Data were expressed as % of WT young mice (100%). (D) Brain weight . n=8-10 mice per group.

### Supplemental Figure III: Representative recording of a Nox2KO young DA neuron firing recording

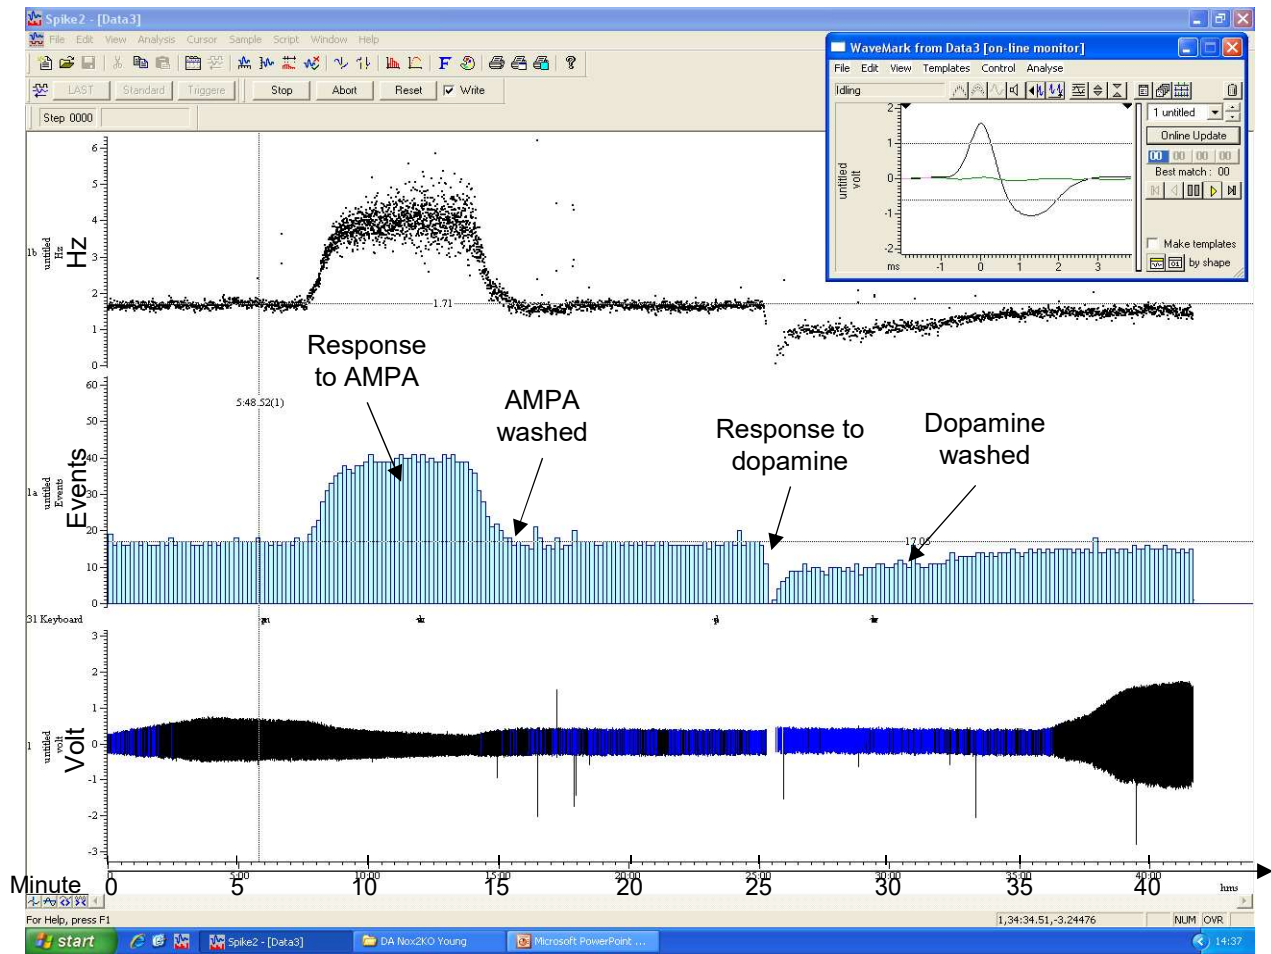

Figure III. Representative real-time recording (screen shot) of a young Nox2KO dopaminergic neuron firing. A baseline firing frequency was recorded for 5-10 minutes. AMPA was then perfused and recorded for ~6 min. The AMPA was then washed out and firing frequency was left to return to its basal rate. After 10-15 minutes 50  $\mu$ M dopamine was perfused, which blunted dopaminergic neuron firing. The dopamine was washed out to allow firing to return to normal that ensured the blunting of the signal was due to the dopamine perfusion. The results were analyzed manually on the Spike 2 Software.

**Supplemental Figure IV: Effects of enzyme inhibitor on human brain ROS production detected by lucigenin-chemiluminescence**

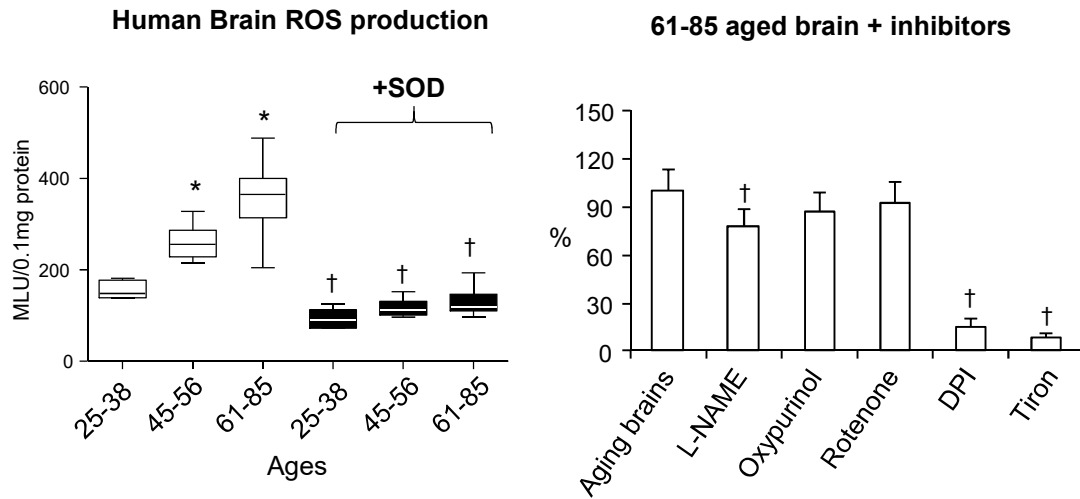

Figure IV: Left panel: ROS production by human brain homogenates detected by lucigenin-chemiluminescence. Right panel: The effects of difference enzyme inhibitors on the levels of ROS production by aging human brain (100%). n = 6-8 individual/group. \*P<0.05 for indicated values versus young values. †p<0.05 for indicated values versus the values without inhibitor in the same age group.

**Supplemental Figure V. Levels of lipid peroxidation in human mid-brain tissues.**

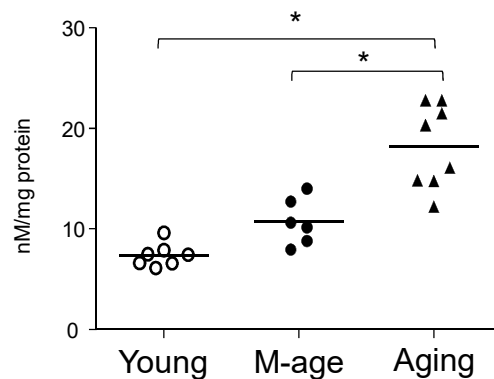

Figure V: Lipid peroxidation was detected by MDA assay using homogenate of human mid-brain tissues according to manufacturer's instruction (Sigma-Aldrich, UK). n = 6-8 individual/group. \*P<0.05.

**Supplemental Figure VI:** Real-time PCR detection of Human Nox2 transgene only expressed in endothelial cells isolated from HuNox2Tg mice.

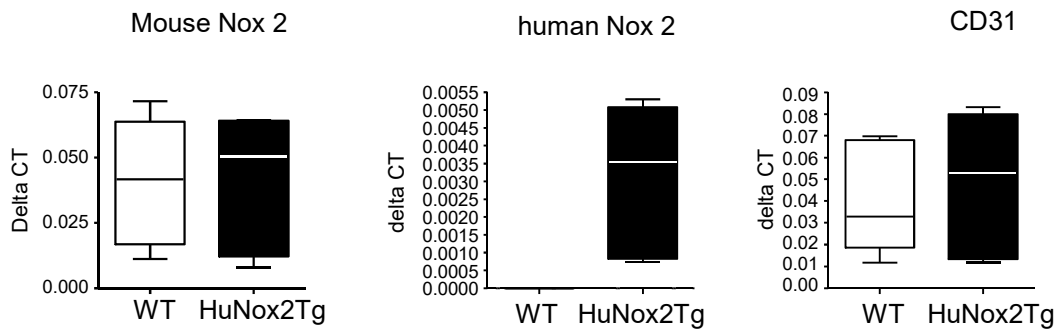

Figure VI: RNA were extracted from primary endothelial cells isolated from lungs of WT and HuNox2Tg mice and reverse transcribed into cDNA. Levels of gene expression of mouse Nox2, human Nox2, CD31 (endothelial cell marker) were detected by real time quantitative RT-PCR. Fold change was expressed as  $\Delta C_t$  relative to GAPDH. n=6 isolations per group.

**Supplemental Figure VII:** Endothelial dependent ROS production by WT and HuNox2Tg aortas

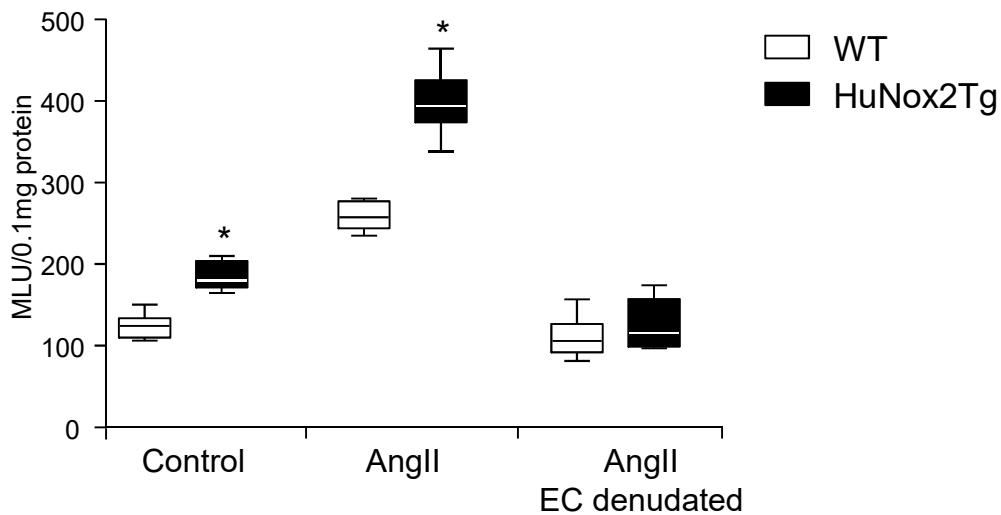

Figure VII: Aorta segments were incubated with AngII (200  $\mu\text{mol/L}$ ) for 4h. ROS production by aorta homogenates were detected by lucigenin-chemiluminescence. n=6 per group. \*P<0.05 for indicated values versus WT values in the same treatment group.

**Supplemental Figure VIII:** *In situ* hybridization detection of endothelial expression of human Nox2 mRNA in brain sections of WT and HuNox2Tg mice by RNAscope.

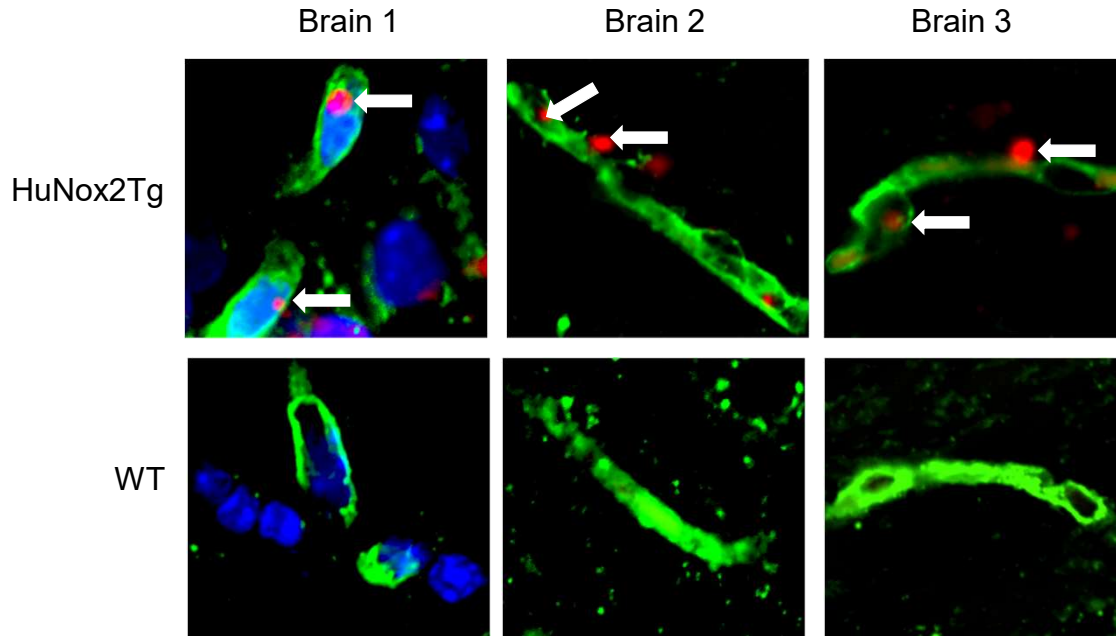

Figure VIII: RNAscope of human Nox2 mRNA was performed according to manufacturer's instruction (Advanced Cell Diagnostics Inc, USA). Cerebral endothelial cells were labelled by LE-lectin (FITC, green). The nuclei were labelled by DAPI (blue, left panel). The human Nox2 mRNA (labelled by fast red, as indicated by the arrows) were detected only in the nuclei of endothelial cells in the HuNox2Tg brain sections but not in WT brain sections.

**Supplemental Figure IX:** Levels of lipid peroxidation in WT and HuNox2Tg brain tissues detected by MDA assay

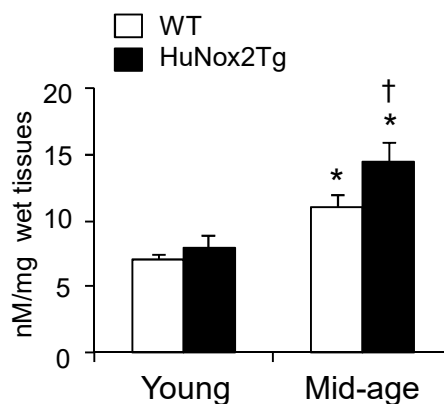

Figure IX: Homogenates of mid-brain tissues were used for MDA assay according to manufacturer's instruction (Sigma-Aldrich, UK). n=6 per group. \*P<0.05 for indicated values versus young values in the same genetic group. †p<0.05 for indicated values versus WT values in the same age group.

**Supplemental Table 1: List of antibodies used in the study**

| <b>Antibodies</b>                    | <b>Host &amp; Type</b> | <b>Dilution</b> | <b>Company</b>  | <b>Catalogue No.</b> |
|--------------------------------------|------------------------|-----------------|-----------------|----------------------|
| CD31                                 | Goat polyclonal        | 1:500 (IF)      | Santa Cruz      | sc-1506              |
| NeuN                                 | Mouse polyclonal       | 1:500 (IF)      | Millipore       | MAB377               |
| $\alpha$ -tubulin                    | Mouse monoclonal       | 1:1000          | Santa Cruz      | sc-53646             |
| Nox1                                 | Goat polyclonal        | 1:1000          | Santa Cruz      | sc-5821              |
| Nox2                                 | Rb polyclonal          | 1:1000          | Santa Cruz      | sc-20782             |
| Nox4                                 | Rb polyclonal          | 1:1000          | Santa Cruz      | sc-30141             |
| p22phox                              | Goat polyclonal        | 1:1000          | Santa Cruz      | sc-11712             |
| p40phox                              | Mouse monoclonal       | 1:1000          | Santa Cruz      | sc-48376             |
| p47phox                              | Rb polyclonal          | 1:1000          | Santa Cruz      | sc-14015             |
| Phos-p47phox<br>(Ser359)             | Rb polyclonal          | 1:500           | Sigma           | SAB4504289           |
| p53                                  | Mouse monoclonal       | 1:500           | Santa Cruz      | sc-126               |
| p67phox                              | Goat polyclonal        | 1:1000          | Santa Cruz      | sc-7663              |
| Rac-1                                | Rb polyclonal          | 1:1000          | Santa Cruz      | sc-217               |
| Total-p38MAPK                        | Rb polyclonal          | 1:1000          | Santa Cruz      | sc-535               |
| phos-p38 MAPK<br>(Thr180/Tyr182)     | Rb polyclonal          | 1:500           | Cell Signalling | 9211                 |
| Total-ERK1/2                         | Rb polyclonal          | 1:1000          | Santa Cruz      | sc-292838            |
| Phos-ERK1/2<br>(Thr202/Tyr204)       | Rb polyclonal          | 1:500           | Sigma           | SAB4301578           |
| H2AX                                 | Rb polyclonal          | 1:1000          | Cell Signalling | 2595                 |
| Phos-H2AX<br>(Ser139, $\gamma$ H2AX) | Rb polyclonal          | 1:500           | Cell Signalling | 2577                 |
| Total-JNK                            | Mouse monoclonal       | 1:500           | Santa Cruz      | sc-7345              |
| Phos-JNK<br>(Thr 183/Tyr 185)        | Goat polyclonal        | 1:500           | Santa Cruz      | sc-12882             |
| p-MARCKS<br>(Ser152/156)             | Rb polyclonal          | 1:1000          | Sigma-Aldrich   | 07-1238              |
| Anti-goat IgG                        |                        | 1:2000          | Sigma           | 098K4770             |
| Anti-mouse IgG                       |                        | 1:2000          | Seracare-KPL    | 474-1806             |
| Anti-rabbit IgG                      |                        | 1:2000          | Seracare-KPL    | 5450-0010            |

**Supplemental Table 2.** Demographics of human brain tissues

| <b>ID</b>          | <b>Age</b> | <b>Sex</b> | <b>Ethnic</b> | <b>Cause of Death</b> | <b>Comorbidity</b>               | <b>PMI (h)</b> |
|--------------------|------------|------------|---------------|-----------------------|----------------------------------|----------------|
| <b>Young n=7</b>   |            |            |               |                       |                                  |                |
| SD008/12           | 25         | male       | Caucasian     | Accident              | Schizophrenia                    | 53             |
| SD042/12           | 29         | male       | Caucasian     | Accident              | Nil known                        | 44             |
| SD009/05           | 34         | male       | Caucasian     | Drug overdose         | Depression                       | 79             |
| SD026/16           | 37         | female     | Caucasian     | Myocardial fibrosis   | Nil known                        | 126            |
| SD022/16           | 39         | male       | Caucasian     | IHD                   | Nil known                        | 86             |
| SD038/16           | 39         | male       | Caucasian     | Accident              | Depression                       | 76             |
| SD004/12           | 39         | male       | Caucasian     | Accident              | Nil known                        | 61             |
| <b>Mid-age n=6</b> |            |            |               |                       |                                  |                |
| SD044/12           | 46         | male       | Caucasian     | IHD                   | Hypertension                     | 52             |
| SD023/12           | 50         | male       | Caucasian     | IHD                   | High cholesterol                 | 45             |
| SD038/12           | 51         | male       | Caucasian     | Cardiac aneurysm      | MI                               | 45             |
| SD037/12           | 52         | male       | Caucasian     | Traffic accident      | Nil known                        | 91             |
| SD035/12           | 54         | male       | Caucasian     | MI                    | Hypertension, MI                 | 74             |
| SD020/12           | 56         | male       | Caucasian     | IHD                   | Hypertension                     | 44             |
| <b>Aging n=8</b>   |            |            |               |                       |                                  |                |
| SD049/12           | 60         | male       | Caucasian     | IHD                   | Diabetes<br>Hypertension         | 54             |
| SD005/14           | 63         | male       | Caucasian     | Lung cancer           | Smoker                           | 42             |
| SD034/15           | 69         | male       | Caucasian     | IHD                   | Hypertension<br>High cholesterol | 49             |
| SD012/17           | 71         | female     | Caucasian     | Accident              | Depression,<br>schizophrenia     | 95             |
| SD008/17           | 71         | female     | Caucasian     | IHD                   | Hypertension<br>Diabetes         | 96             |
| SD005/17           | 84         | male       | Caucasian     | Sepsis                | Diabetes                         | 23             |
| SD036/12           | 75         | male       | Caucasian     | IHD                   | Nil known                        | 78             |
| SD055/12           | 76         | male       | Caucasian     | MI                    | Hypertension                     | 90             |

PMI=post-mortem interval; IHD=Ischemic heart diseases; MI=myocardial infarction
